# Supplementary material for: Exploring Heterosis in Melon (Cucumis melo L.)
Source: MDPI journal article supplement (doi:10.3390/plants9020282), 2020-02-21
Supplement: s1 [file s1]

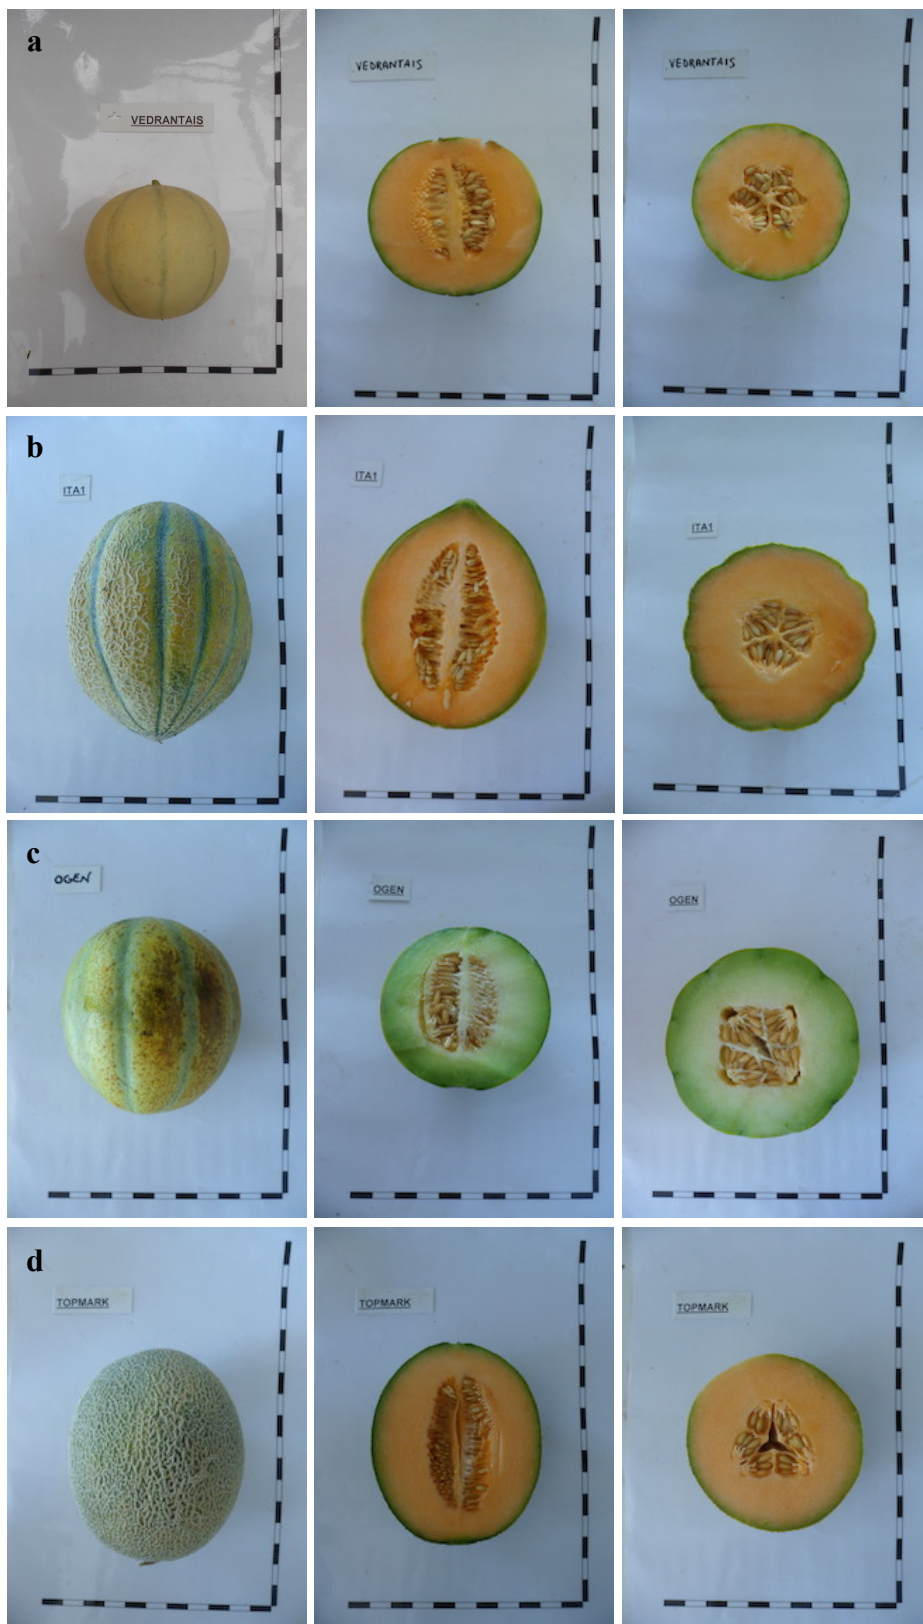

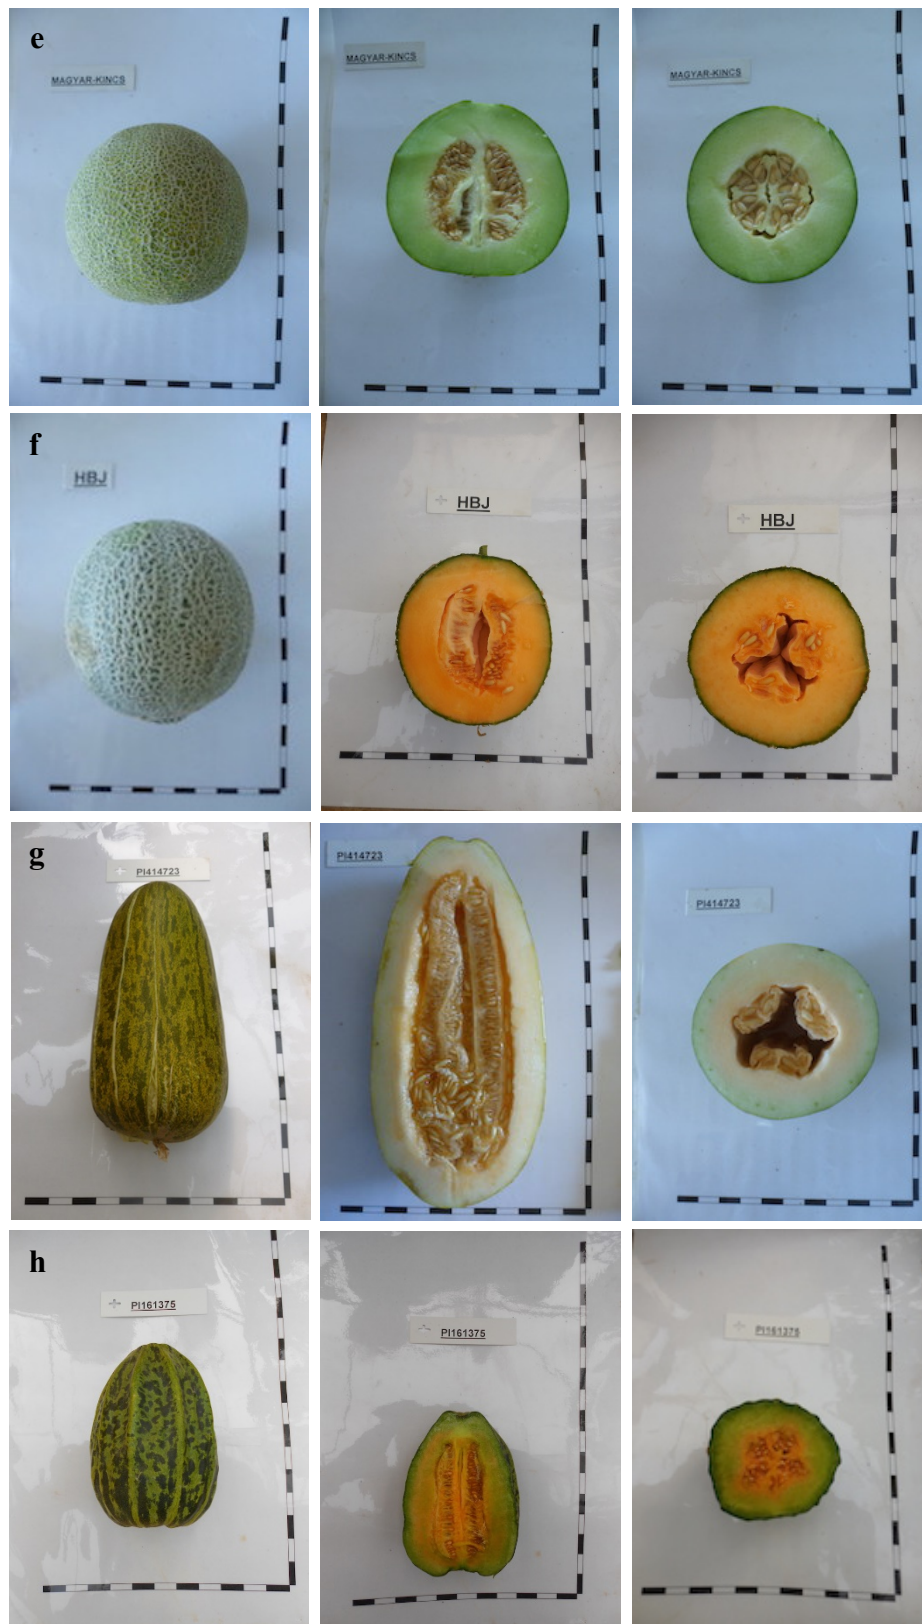

Figure S1. Representative fruits of the used inbred lines: (a) VEDRANTAIS (*cantalupensis*); (b) ITA1 (*reticulatus*); (c) OGEN (*cantalupensis*); (d) TOP MARK (*reticulatus*); (e) MAGYAR KINC3 (*reticulatus*); (f) HALE'S BEST JUMBO (*reticulatus*); (g) PI414723 (*momordica*); (h) PI161375 (*chinensis*); bar 2 cm.
